# Supplementary material for: Confining Sb nanoparticles in bamboo-like hierarchical porous aligned carbon nanotubes for use as an anode for sodium ion batteries with ultralong cycling performance
Source: Royal Society of Chemistry journal article supplement (doi:10.1039/d0ta10556b), 2020-12-09
Supplement: d0ta10556b1.pdf [file d0ta10556b1.pdf]

## Supporting information

### Confining Sb Nanoparticles in Bamboo-like Hierarchical Porous Aligned Carbon Nanotubes as an Anode for Sodium Ion Battery with Ultralong Cyclic performance

Chao Kang<sup>a</sup>, Shengping Zhou<sup>a</sup>, Jilei Liu<sup>a</sup>, YanFei Zhu<sup>a</sup>, Aiping Hu<sup>\*a</sup>, Qunli Tang<sup>a</sup>, Yan Zhang<sup>a</sup>, Xiaohua Chen<sup>\*a</sup>, Tao Tao<sup>b</sup>

*a. College of Materials Science and Engineering, Hunan University, Changsha, 410082, China.*

*E-mail: hudaapinghu@126.com; xiaohuachen@hnu.edu.cn*

*b. Dongguan South China Design Innovation Institute, Dongguan, 523808, China*

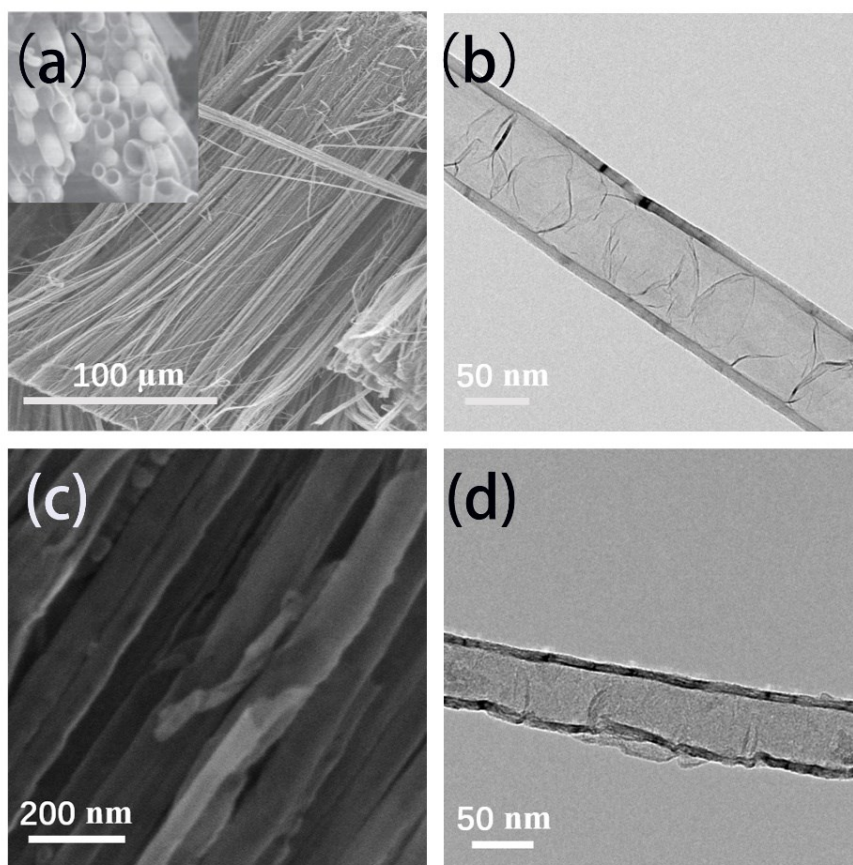

**Fig. S1** (a-b) SEM and TEM of fresh bamboo-like ACNTs; (c-d) SEM and TEM of activated bamboo-like ACNTs.

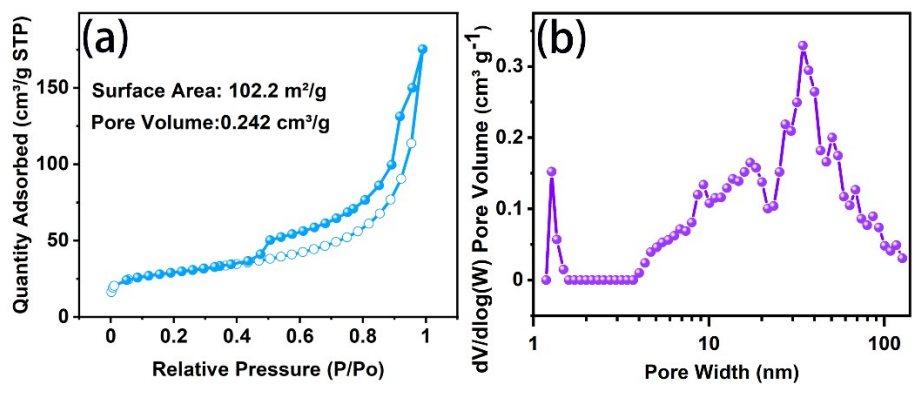

**Fig. S2** Nitrogen adsorption-desorption curves of HPACNTs pore distribution (the inset).

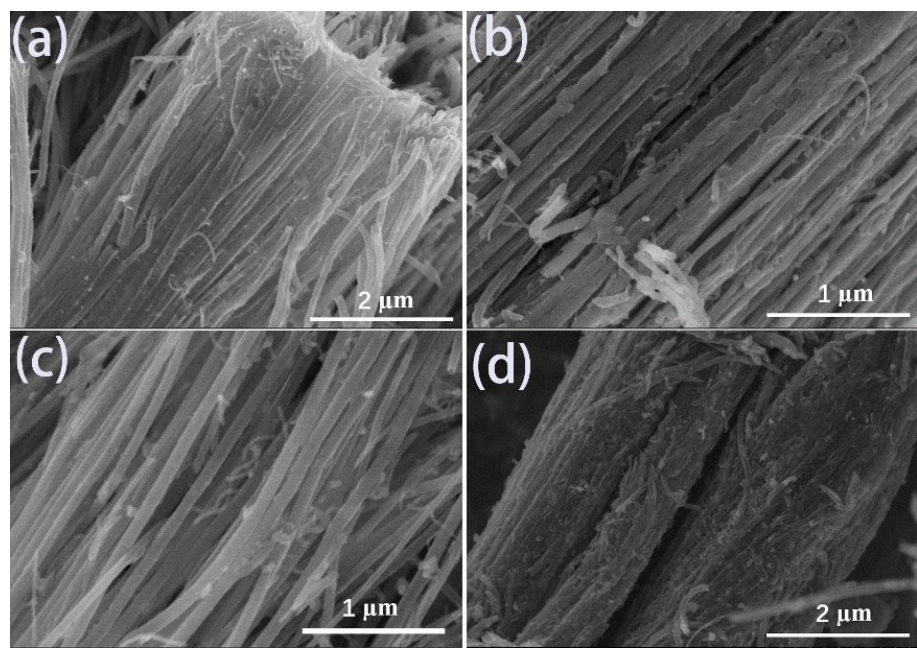

**Fig. S3** SEM of samples (a) Sb/ACNTs-7; (b) Sb/HPACNTs-6; (c) Sb/HPACNTs-7; (d) Sb/HPACNTs-8.

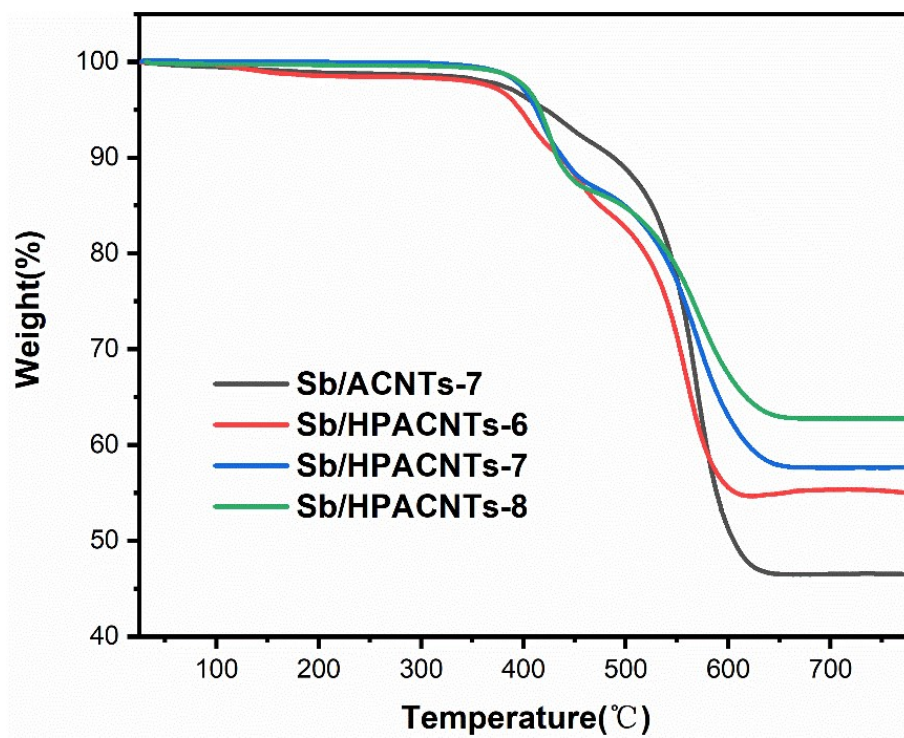

**Fig. S4** TG curves of samples Sb/ACNTs-7; Sb/HPACNTs-6; Sb/HPACNTs-7; Sb/HPACNTs-8.

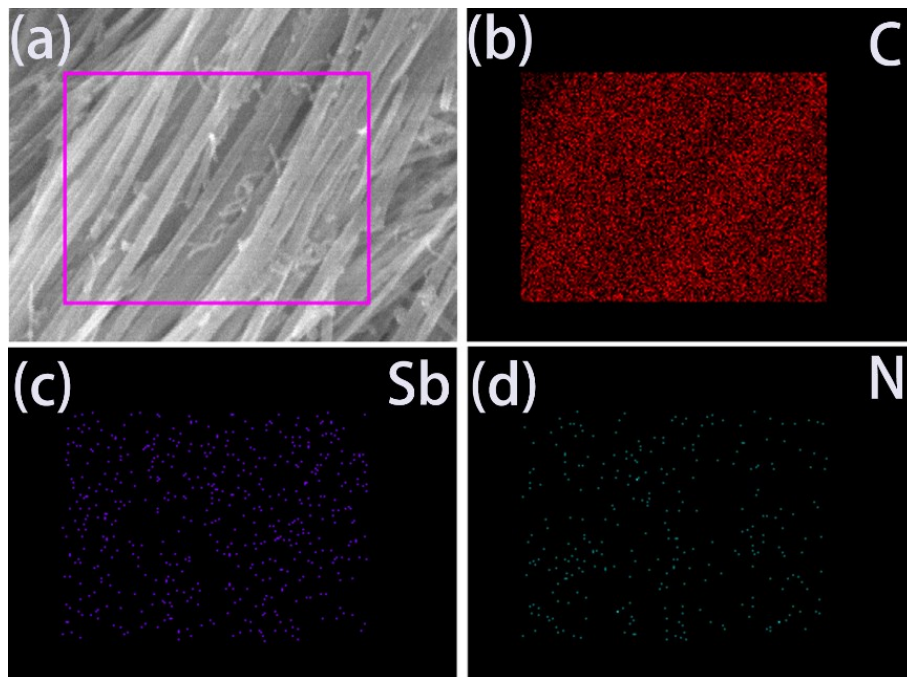

**Fig. S5** SEM of samples (a) Sb/ACNTs-7; (b-d) element mappings of C, Sb and N.

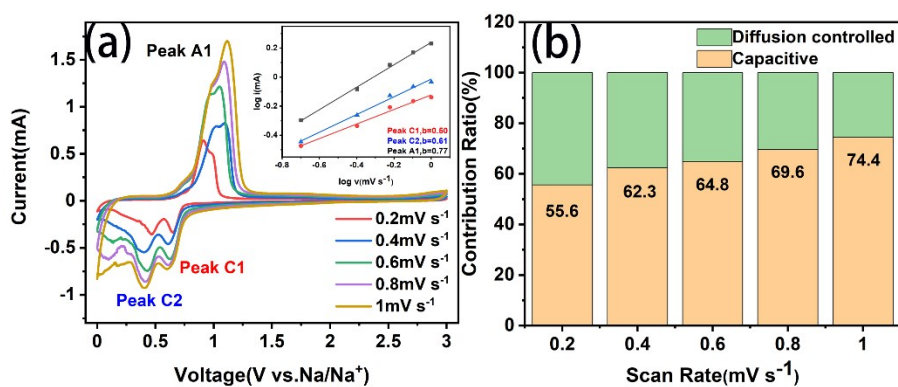

**Fig. S6** (a) CV curves of sample Sb/HPACNTs-7 at various scan rates from 0.2 to 1.0 mV s<sup>-1</sup>; (b) bar chart of the percentage of capacitive contribution at various scan rates.

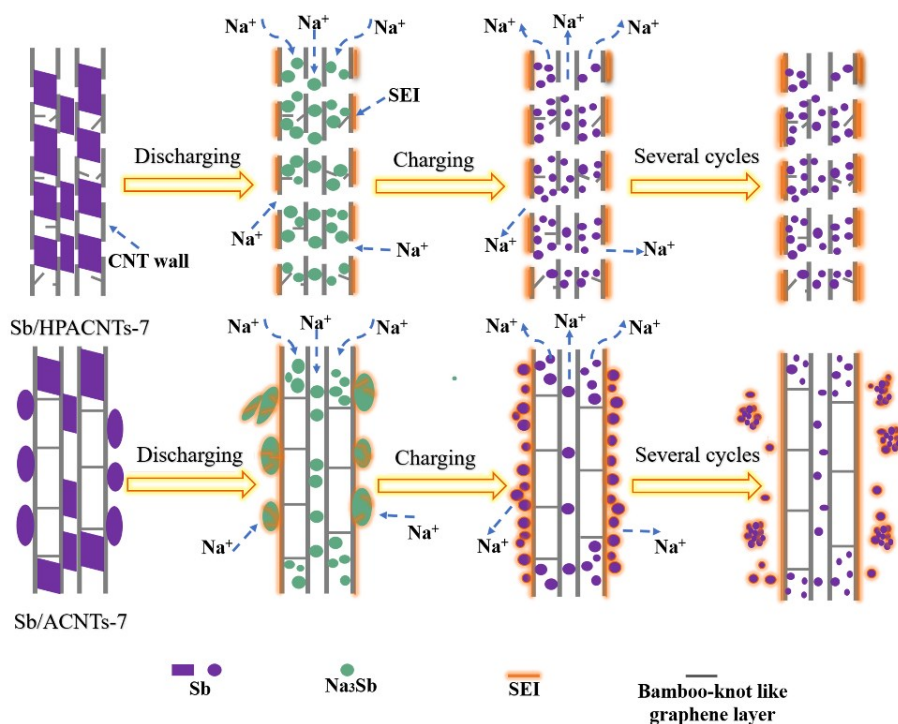

**Fig. S7** Schematic structure evolution of active materials Sb in the process of cycling.

**Table. S1** Electrochemical performances of the representative Sb-based anodes for SIBs.

| Electrode materials     | Rate capability<br>(mAh g <sup>-1</sup> )                      | Cycling capacity<br>(mAh g <sup>-1</sup> ) | Reference |
|-------------------------|----------------------------------------------------------------|--------------------------------------------|-----------|
| Nanoporous Sb           | 510 (1.32A g <sup>-1</sup> )<br>420 (3.3A g <sup>-1</sup> )    | 574 (0.1 A g <sup>-1</sup> ), 200 cycles   | 1         |
| Sb@C yolk-shell spheres | 408 (0.5 A g <sup>-1</sup> )<br>279 (2 A g <sup>-1</sup> )     | 280 (1 A g <sup>-1</sup> ), 200 cycles     | 2         |
| Peapod-like Sb@N-C      | 638 (0.1 A g <sup>-1</sup> )<br>310 (10 A g <sup>-1</sup> )    | 346 (2 A g <sup>-1</sup> ), 3000 cycles    | 3         |
| Nanoporous Sb/C         | 461 (0.1 A g <sup>-1</sup> )<br>298 (4 A g <sup>-1</sup> )     | 403 (1 A g <sup>-1</sup> ), 1000 cycles    | 4         |
| Sb@HCMs                 | 470 (0.1 A g <sup>-1</sup> )<br>311.5 (3.2 A g <sup>-1</sup> ) | 454 (0.5 A g <sup>-1</sup> ), 150 cycles   | 5         |
| Sb@C yolk-shell         | 554 (0.05 A g <sup>-1</sup> )<br>315 (5A g <sup>-1</sup> )     | 422 (0.5 A g <sup>-1</sup> ), 200cycles    | 6         |
| Sb/N-carbon/CNT         | 533 (0.1 A g <sup>-1</sup> )<br>258 (2 A g <sup>-1</sup> )     | 543 (0.1 A g <sup>-1</sup> ), 200 cycles   | 7         |
| SbNP/MWCNT              | 480 (0.1 A g <sup>-1</sup> )<br>225 (2 A g <sup>-1</sup> )     | 382 (0.2 A g <sup>-1</sup> ), 120 cycles   | 8         |
| Sb/HPACNTs              | 738 (0.1 A g <sup>-1</sup> )<br>406 (5 A g <sup>-1</sup> )     | 318 (1A. g <sup>-1</sup> ), 4500 cycles    | this work |

## References:

1. S. Liu, J. Feng, X. Bian, J. Liu and H. Xu, *Energy Environ. Sci.*, 2016, **9**, 1229-1236.
2. J. Liu, L. Yu, C. Wu, Y. Wen, K. Yin, F. Chiang, R. Hu, J. Liu, L. Sun, L. Gu, J. Maier, Y. Yu and M. Zhu, *Nano Lett.*, 2017, **17**, 2034-2042.
3. W. Luo, F. Li, J. Gaumet, P. Magri, S. Diliberto, L. Zhou and L. Mai, *Adv. Energy Mater.*, 2018, **8**, 1703237-1703245.
4. Y. Yuan, S. Jan, Z. Wang and X. Jin, *J. Mater. Chem. A*, 2018, **6**, 5555-5559.
5. W. Meng, M. Guo, X. Liu, J. Chen, Z. Bai and Z. Wang, *J. Alloys Compd.*, 2019, **795**, 141-150.
6. J. Song, P. Yan, L. Luo, X. Qi, X. Rong, J. Zheng, B. Xiao, S. Feng, C. Wang, Y. Hu, Y. Lin, V. L. Sprenkle and X. Li, *Nano Energy*, 2017, **40**, 504-511.
7. X. Liu, Y. Du, X. Xu, X. Zhou, Z. Dai and J. Bao, *The Journal of Physical Chemistry C*, 2016, **120**, 3214-3220.
8. X. Zhou, Z. Dai, J. Bao and Y. Guo, *J. Mater. Chem. A*, 2013, **1**, 13727-13731.
